# Supplementary material for: Species recovery and recolonization of past habitats: lessons for science and conservation from sea otters in estuaries
Source: PeerJ journal article supplement (doi:10.7717/peerj.8100), 2019-12-10

Model Sensitivity Analysis: Responses to Parameter Perturbations (-10%)

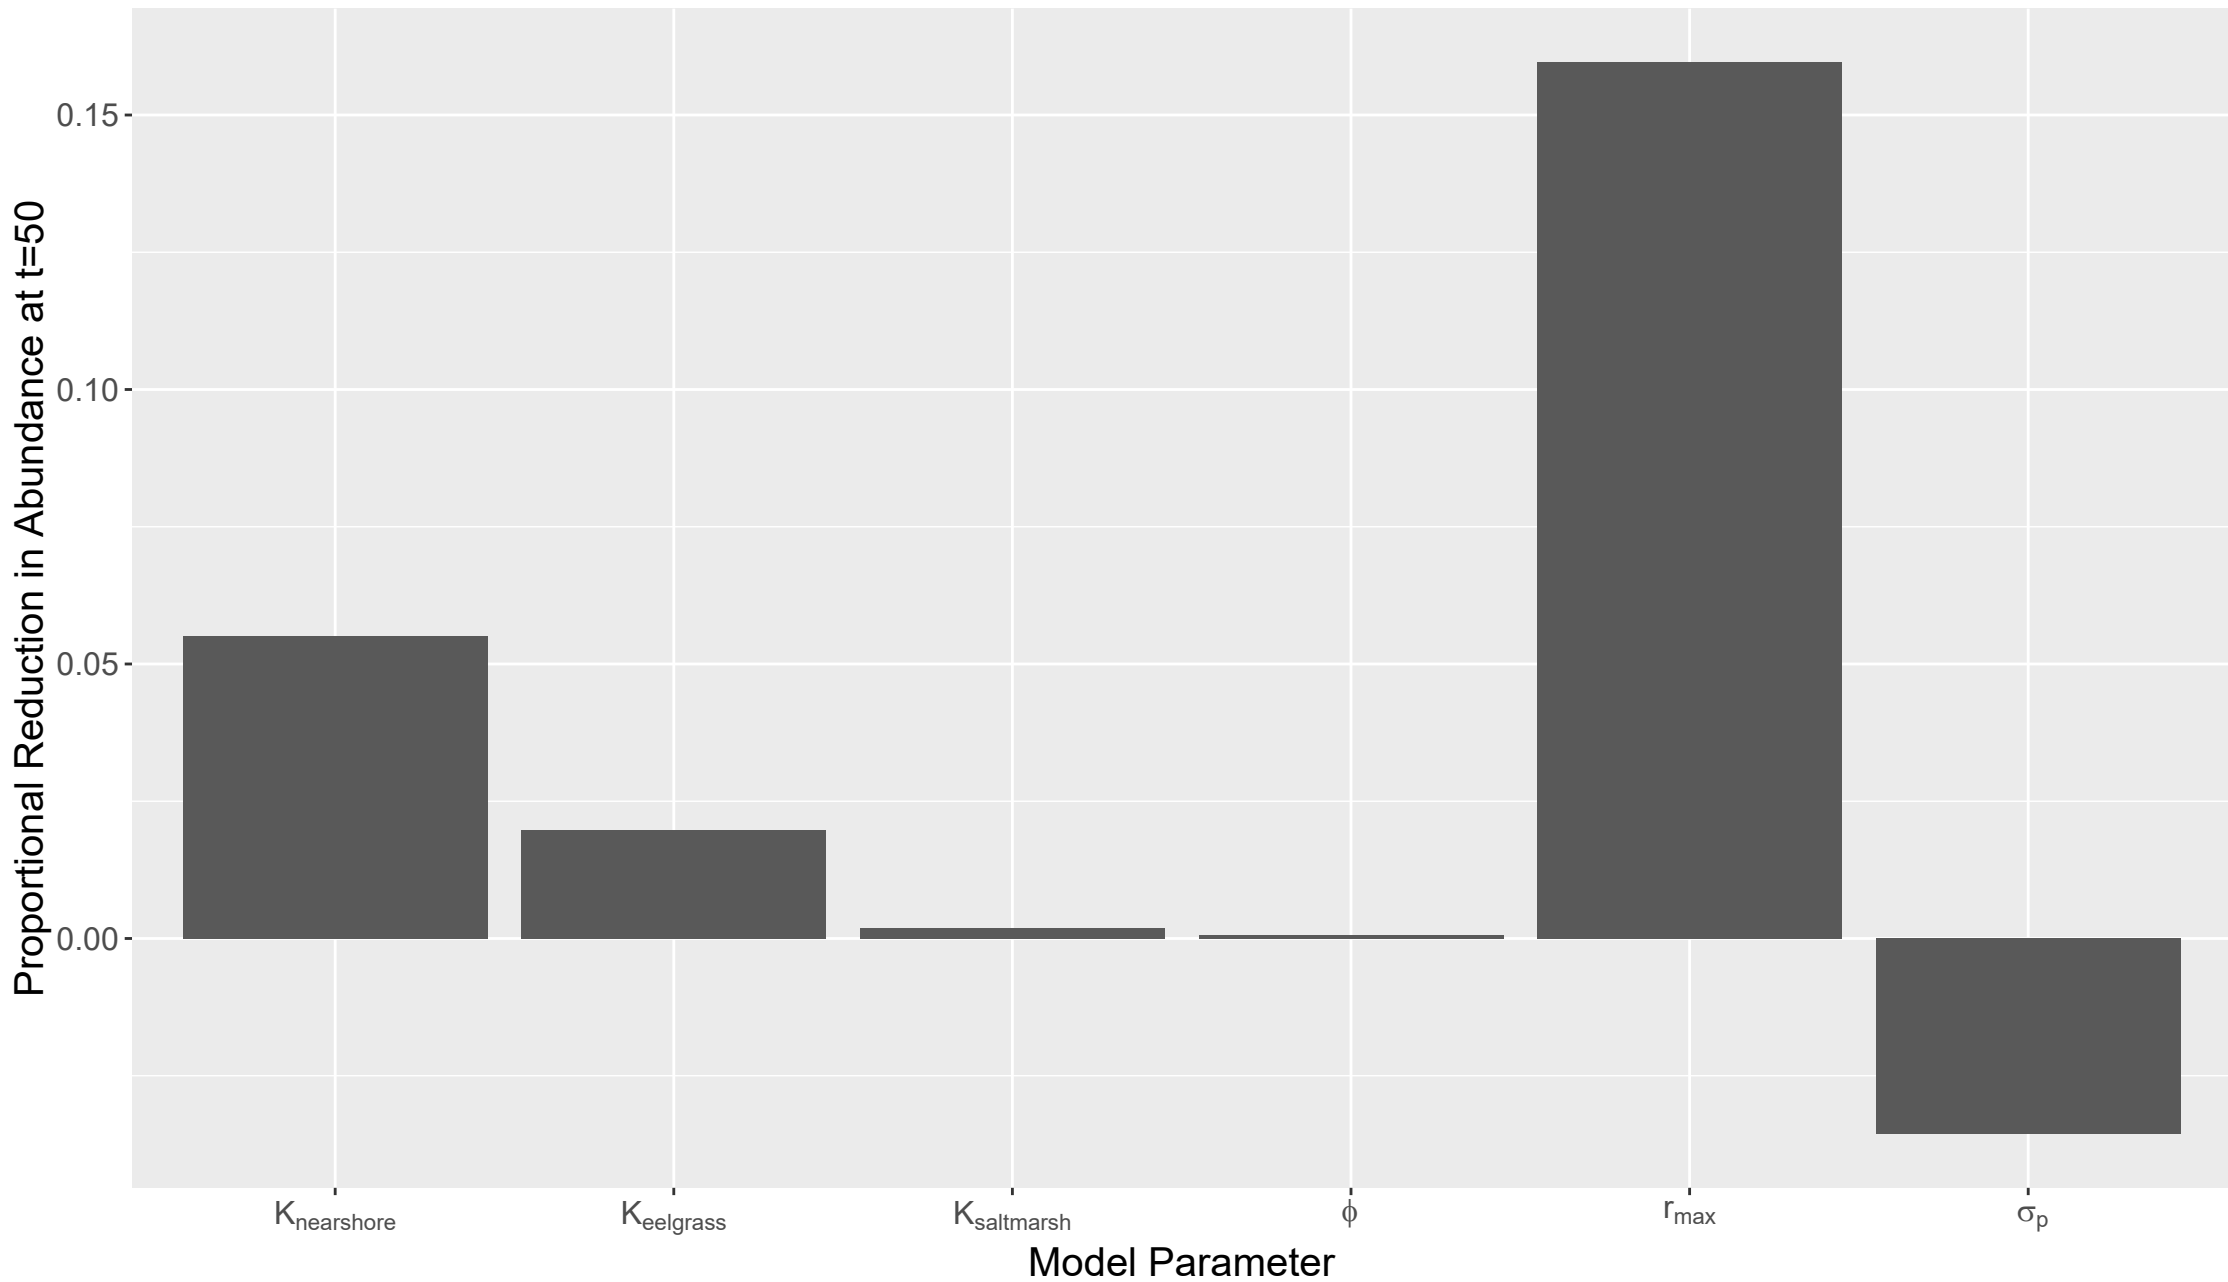

Supplement: Hughes_Fig_S5_Sensitivity_plot.pdf [file Hughes_Fig_S5_Sensitivity_plot.pdf]
